# Supplementary material
Source: PubMed Central journal article supplement (PMC3331963)
Supplement: NIHMS362888-supplement-1.pdf [file NIHMS362888-supplement-1.pdf]

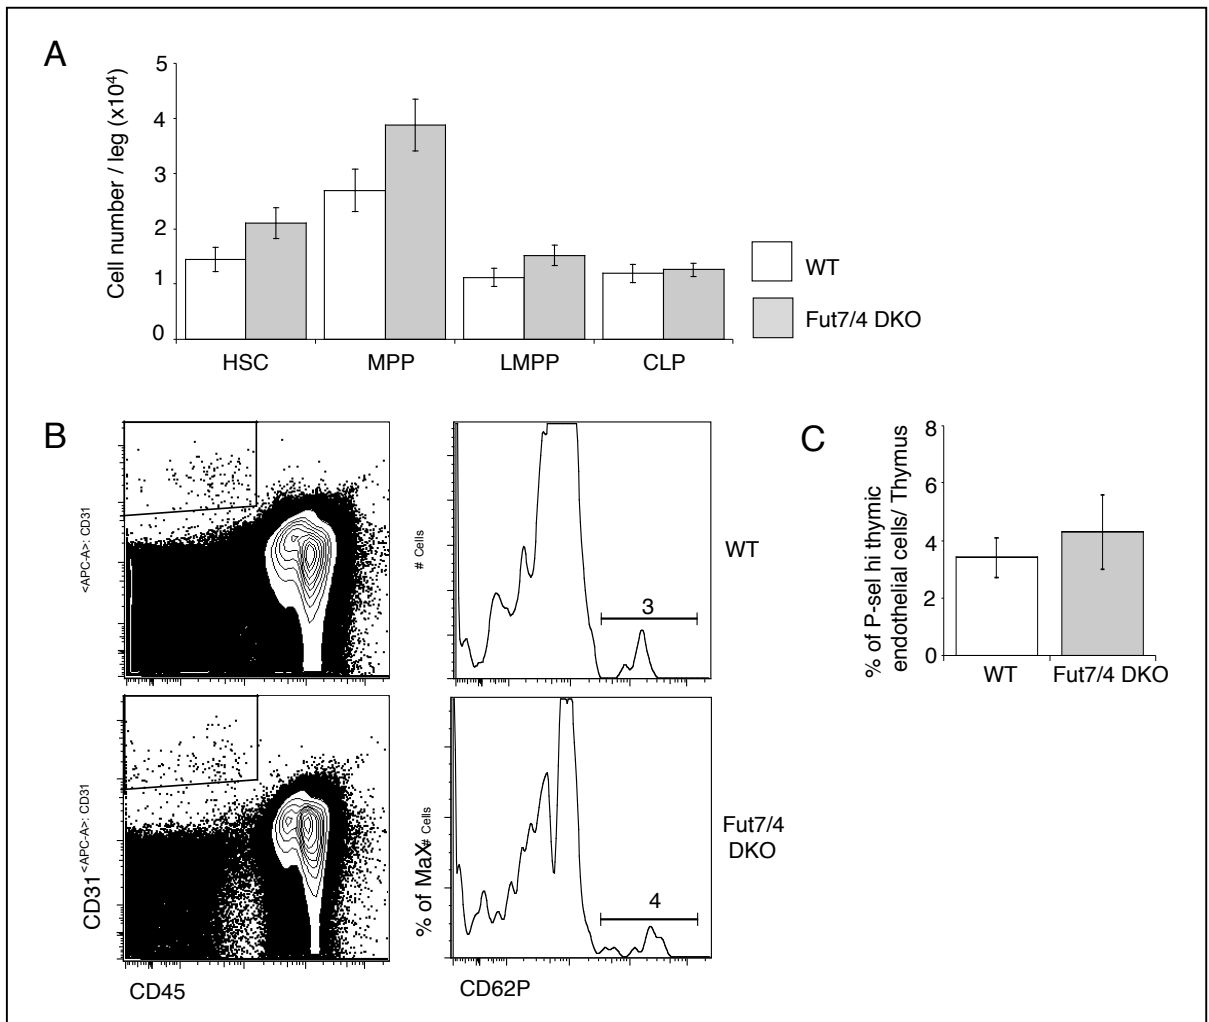

**Supplemental Figure 1. BM progenitors and thymic endothelium cell population in Fuc-TVII/Fuc-TIV DKO mice.** (A) BM from WT and Fuc-TVII/Fuc-TIV DKO mice were analyzed by flow cytometry to determine total number of the HSCs, MPPs, LMPPs and CLPs progenitors. Numbers are expressed as total cells per leg. Shown is the mean  $\pm$  SEM for 3 WT and 5 Fuc-TVII/Fuc-TIV DKO mice. (B) Thymic endothelium cell fractions were prepared with liberase and DNase treatment followed by depletion of CD4<sup>+</sup>, CD8<sup>+</sup> thymocytes of C57BL/6 WT (upper panel) and Fuc-TVII/Fuc-TIV DKO (lower panel) thymus and was analyzed by flow cytometry for CD45<sup>-</sup>CD31<sup>+</sup> cells. Histogram shows P-selectin expression gated on endothelium cells. (C) Numbers

represent the percent of P-selectin<sup>+</sup> endothelial cells gated on (Supplemental Fig. 1*B*) in the indicated mice. Data shown are the mean  $\pm$  SEM for 4 WT and 4 Fuc-TVII/Fuc-TIV DKO mice.
